# Supplementary material
Source: Springer Nature journal article supplement (https://www.springermedizin.de/resource/supplementary/12931_2012_1241_MOESM2_ESM.pdf/9425826)

A)

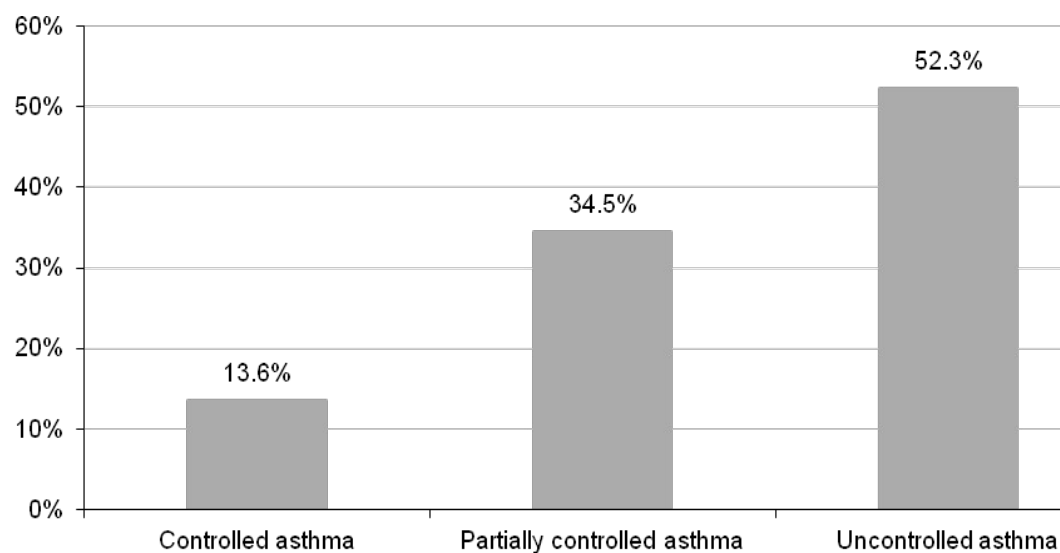

B)

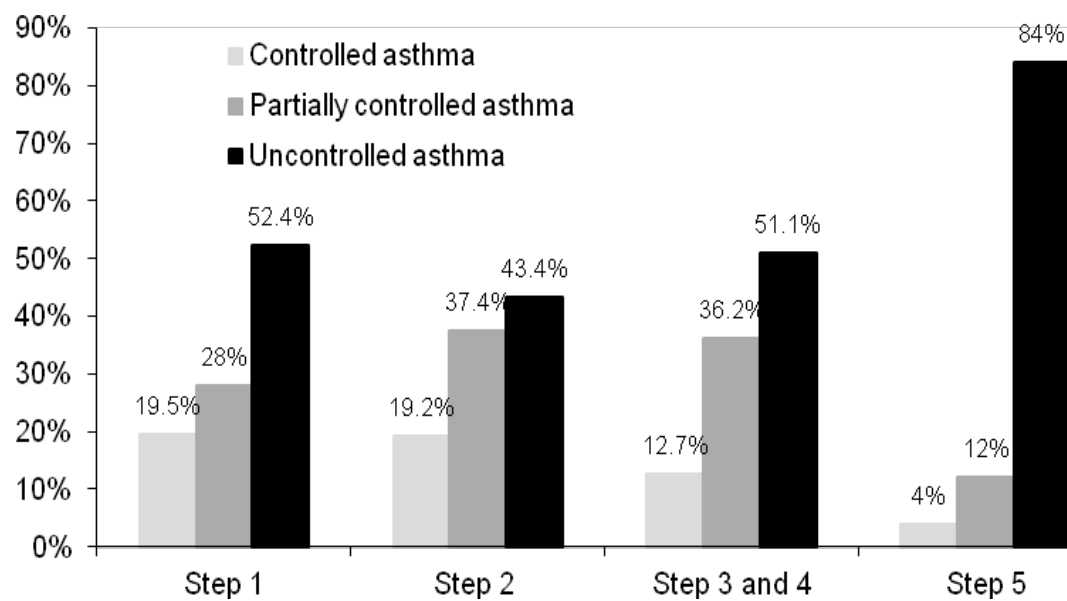

Supplement: MOESM2 [file 9425826]
